# Supplementary material for: Subchronic arsenic exposure induced intestinal flora dysbiosis and intestinal inflammation via activating the NF-κB signaling pathway
Source: Research Square preprint supplement (doi:10.21203/rs.3.rs-6759637/v1), 2025-06-30
Supplement: Supplementary file 1 [file f4c06dac4647dc258d1aad64.docx]

Supplementary Material

1. Supplementary Figures

Figure S1. The CCK-8 assay was used to evaluate the effects of different concentrations of PDTC on the viability of NCM460 cells at 24 h. ** *p* < 0.01 compared to the 0 μM PDTC group.
